# Supplementary material for: Genome-Wide Identification and Immune Response Analysis of Serine Protease Inhibitor Genes in the Silkworm, Bombyx mori
Source: PubMed Central journal article supplement (PMC3278429; doi:10.1371/journal.pone.0031168), 2012-02-13
Supplement: pone.0031168.s005.pdf [file pone.0031168.s005.pdf]

**Supporting Information Table 1**

The serine protease inhibitors in the silkworm

| Name    | Name in silkDB | SPI domain | Numbers of SPI domain | Chr.# | Scaffold #   | Starting point | End point | Chain | EST | Annotation |
|---------|----------------|------------|-----------------------|-------|--------------|----------------|-----------|-------|-----|------------|
| BmSPI1  | BGIBMGA009953  | Serpin     | 1                     | /     | nscf2979     | 113003         | 118777    | -     | Yes | Serpin1    |
| BmSPI2  | BGIBMGA007720  | Serpin     | 1                     | 15    | nscf2888     | 1695601        | 1703011   | -     | Yes | Serpin2    |
| BmSPI3  | BGIBMGA010212  | Serpin     | 1                     | 7     | nscf2986     | 2025913        | 2049705   | +     | Yes | Serpin3    |
| BmSPI4  | BGIBMGA013852  | Serpin     | 1                     | 28    | nscf3098     | 198532         | 199764    | +     | Yes | Serpin4    |
| BmSPI5  | BGIBMGA013849  | Serpin     | 1                     | 28    | nscf3098     | 156075         | 157103    | +     | Yes | Serpin5    |
| BmSPI6  | BGIBMGA007729  | Serpin     | 1                     | 15    | nscf2888     | 1281387        | 1287794   | -     | Yes | Serpin6    |
| BmSPI7  | BGIBMGA013903  | Serpin     | 1                     | 28    | nscf3099     | 534661         | 535860    | -     | Yes | Serpin7    |
| BmSPI8  | BGIBMGA013904  | Serpin     | 1                     | 28    | nscf3099     | 2672749        | 2675709   | -     | Yes | Serpin8    |
| BmSPI9  | BGIBMGA001983  | Serpin     | 1                     | 19    | nscf2204     | 4280050        | 4285863   | +     | Yes | Serpin9    |
| BmSPI10 | BGIBMGA010214  | Serpin     | 1                     | 7     | nscf2986     | 2083047        | 2086003   | +     | Yes | Serpin10   |
| BmSPI11 | BGIBMGA010213  | Serpin     | 1                     | 7     | nscf2986     | 2059013        | 2064447   | +     | Yes | Serpin11   |
| BmSPI12 | BGIBMGA010216  | Serpin     | 1                     | 7     | nscf2986     | 2098064        | 2104805   | +     | Yes | Serpin12   |
| BmSPI13 | BGIBMGA002368  | Serpin     | 1                     | /     | nscf2439     | 2860           | 4292      | +     | Yes | Serpin13   |
| BmSPI14 | BGIBMGA013958  | Serpin     | 1                     | 28    | nscf3099     | 567124         | 568323    | +     | Yes | Serpin14   |
| BmSPI15 | BGIBMGA008831  | Serpin     | 1                     | 3     | nscf2925     | 475942         | 483150    | +     | Yes | Serpin15   |
| BmSPI16 | BGIBMGA003292  | Serpin     | 1                     | /     | nscf2641     | 21922          | 28230     | +     | Yes | Serpin16   |
| BmSPI17 | BGIBMGA008830  | Serpin     | 1                     | 3     | nscf2925     | 461290         | 468785    | +     | Yes | Serpin17   |
| BmSPI18 |                | Serpin     | 1                     | /     | nscf2641     | 1197           | 7586      | +     | Yes | Serpin18   |
| BmSPI19 | BGIBMGA004735  | Serpin     | 1                     | 22    | nscf2814     | 364955         | 383519    | +     | Yes | Serpin19   |
| BmSPI20 | BGIBMGA008827  | Serpin     | 1                     | 3     | nscf2925     | 436242         | 442612    | +     | Yes | Serpin20   |
| BmSPI21 |                | Serpin     | 1                     | 15    | nscf2888     | 3730190        | 3742067   | -     | Yes | Serpin21   |
| BmSPI22 |                | Serpin     | 1                     | /     | scaffold2278 | 254            | 2426      | -     | Yes | Serpin22   |
| BmSPI23 |                | Serpin     | 1                     | 22    | nscf2814     | 377650         | 383519    | +     | Yes | Serpin23   |
| BmSPI24 | BGIBMGA008828  | Serpin     | 1                     | 3     | nscf2925     | 445169         | 447682    | +     | Yes | Serpin24   |
| BmSPI25 | BGIBMGA008826  | Serpin     | 1                     | 3     | nscf2925     | 383697         | 388498    | +     | Yes | Serpin25   |
| BmSPI26 |                | Serpin     | 1                     | /     | scaffold706  | 32832          | 37928     | -     | No  | Serpin26   |
| BmSPI27 | BGIBMGA011587  | Serpin     | 1                     | 23    | nscf3027     | 4608138        | 4613908   | +     | Yes | Serpin27   |

|         |               |                                |       |    |           |          |          |   |     |          |
|---------|---------------|--------------------------------|-------|----|-----------|----------|----------|---|-----|----------|
| BmSPI28 | BGIBMGA004726 | Serpin                         | 1     | 22 | nscaf2814 | 504860   | 511103   | - | Yes | Serpin28 |
| BmSPI29 | BGIBMGA007721 | Serpin                         | 1     | 15 | nscaf2888 | 1649315  | 1655134  | - | Yes | Serpin29 |
| BmSPI30 | BGIBMGA004736 | Serpin                         | 1     | 22 | nscaf2814 | 387723   | 398842   | + | No  | Serpin30 |
| BmSPI31 | BGIBMGA013903 | Serpin                         | 1     | 28 | nscaf3099 | 2677905  | 2680242  | - | Yes | Serpin31 |
| BmSPI32 | BGIBMGA013848 | Serpin                         | 1     | 28 | nscaf3098 | 134013   | 135200   | + | Yes | Serpin32 |
| BmSPI33 | BGIBMGA001066 | Serpin                         | 1     | 13 | nscaf1898 | 703219   | 705634   | - | Yes | Serpin33 |
| BmSPI34 | BGIBMGA003349 | Serpin                         | 1     | 15 | nscaf2655 | 1012273  | 1016336  | - | Yes | Serpin34 |
| BmSPI35 | BGIBMGA009072 | TIL                            | 1     | 3  | nscaf2931 | 936942   | 937907   | - | Yes |          |
| BmSPI36 | BGIBMGA009095 | TIL                            | 1     | 3  | nscaf2931 | 942071   | 944291   | + | Yes |          |
| BmSPI37 | BGIBMGA009073 | TIL                            | 1     | 3  | nscaf2931 | 919347   | 920110   | - | No  |          |
| BmSPI38 | BGIBMGA009094 | TIL                            | 1     | 3  | nscaf2931 | 912977   | 913700   | + | Yes |          |
| BmSPI39 | BGIBMGA009092 | TIL                            | 1     | 3  | nscaf2931 | 894015   | 896376   | + | No  |          |
| BmSPI40 | BGIBMGA009091 | TIL                            | 1     | 3  | nscaf2931 | 881660   | 883488   | + | Yes |          |
| BmSPI41 | BGIBMGA009093 | TIL                            | 1     | 3  | nscaf2931 | 899792   | 899959   | + | No  |          |
| BmSPI42 | BGIBMGA009075 | TIL                            | 1     | 3  | nscaf2931 | 551264   | 552975   | - | Yes |          |
| BmSPI43 | BGIBMGA009096 | TIL                            | 3     | 3  | nscaf2931 | 958549   | 972519   | + | Yes |          |
| BmSPI44 | BGIBMGA006251 | TIL                            | 1     | 6  | nscaf2851 | 1060348  | 1063762  | + | No  |          |
| BmSPI45 | BGIBMGA006235 | TIL                            | 3     | 6  | nscaf2851 | 1089671  | 1100598  | - | Yes |          |
| BmSPI46 | BGIBMGA004727 | TIL                            | 4     | 22 | nscaf2814 | 486479   | 490449   | - | No  |          |
| BmSPI47 | BGIBMGA004728 | TIL                            | 6     | 22 | nscaf2814 | 421025   | 435042   | - | Yes |          |
| BmSPI48 | BGIBMGA010892 | TIL                            | 4     | 22 | nscaf3005 | 1142843  | 1143684  | + | Yes |          |
| BmSPI49 | BGIBMGA010889 | TIL                            | 5     | 22 | nscaf3005 | 1095501  | 1100551  | + | Yes |          |
| BmSPI50 |               | Kunitz_BPTI                    | 1     | 2  | nscaf2964 | 2742907  | 2744750  | + | Yes | AAO17293 |
| BmSPI51 |               | Kunitz_BPTI                    | 1     | /  | nscaf2818 | 112890   | 115513   | + | Yes | AAL83944 |
| BmSPI52 | BGIBMGA003074 | Kunitz_BPTI                    | 1     | 4  | nscaf2589 | 735178   | 735988   | - | No  |          |
| BmSPI53 | BGIBMGA006340 | Kunitz_BPTI                    | 1     | 6  | nscaf2852 | 2595227  | 2596475  | + | No  |          |
| BmSPI54 | BGIBMGA001246 | Kunitz_BPTI                    | 1     | 13 | nscaf1898 | 11070169 | 11076436 | + | Yes |          |
| BmSPI55 | BGIBMGA001091 | Kunitz_BPTI                    | 1     | 13 | nscaf1898 | 278132   | 291974   | + | Yes |          |
| BmSPI56 | BGIBMGA005119 | Kunitz_BPTI/<br>Antistasin/WAP | 1/3/2 | 25 | nscaf2823 | 1469785  | 1490431  | + | Yes |          |
| BmSPI57 | BGIBMGA005130 | Kunitz_BPTI/<br>WAP            | 4/1   | 25 | nscaf2823 | 1859028  | 1878038  | + | Yes |          |

|         |               |                         |       |    |               |                      |                    |   |     |                          |
|---------|---------------|-------------------------|-------|----|---------------|----------------------|--------------------|---|-----|--------------------------|
| BmSPI58 | BGIBMGA005129 | Kunitz_BPTI             | 8     | 25 | nscf2823      | 1825365              | 1858352            | + | Yes |                          |
| BmSPI59 |               | Kazal                   | 1     | 20 | scaffold826   | 5493                 | 7786               | - | Yes | NP_001037047             |
| BmSPI60 | BGIBMGA011573 | Kazal                   | 1     | 23 | nscf3027      | 3578987              | 3579235            | + | Yes | NP_001040250             |
| BmSPI61 | BGIBMGA014012 | Kazal                   | 1     | 28 | nscf3099      | 4075266              | 4077084            | + | No  |                          |
| BmSPI62 | BGIBMGA003667 | Kazal                   | 1     | 5  | nscf2674      | 3633185              | 3648429            | + | Yes |                          |
| BmSPI63 | BGIBMGA002723 | Kazal                   | 1     | 5  | nscf2529      | 5168618              | 5181244            | - | Yes |                          |
| BmSPI64 | BGIBMGA013485 | Kazal                   | 1     | 5  | nscf3075      | 827184               | 849062             | - | No  |                          |
| BmSPI65 | BGIBMGA009047 | Kazal                   | 3     | 3  | nscf2931      | 1782179              | 1783723            | - | Yes |                          |
| BmSPI66 | BGIBMGA011574 | Kazal                   | 1     | 23 | nscf3027      | 3614163              | 3615180            | + | Yes | NP_001040294             |
| BmSPI67 | BGIBMGA003498 | Kazal                   | 7     | 5  | nscf2674      | 5095535              | 5109274            | - | No  |                          |
| BmSPI68 | BGIBMGA013655 | Kazal                   | 9     | /  | nscf3087      | 33689                | 46217              | - | Yes |                          |
| BmSPI69 | BGIBMGA008205 | amfpi                   | 1     | /  | nscf2893      | 64178                | 65058              | + | Yes | AY655143                 |
| BmSPI70 | BGIBMGA007558 | Kunitz (ITI)            | /     | 15 | nscf2887      | 351002               | 376921             | + | Yes |                          |
| BmSPI71 | BGIBMGA004225 | Pacifastin              | 2     | 20 | nscf2780      | 11962                | 16806              | 0 | No  |                          |
| BmSPI72 | BGIBMGA004226 | Pacifastin              | 4     | 20 | nscf2780      | 34504                | 35673              | + | No  |                          |
| BmSPI73 |               | Pacifastin              | 13/11 | 20 | nscf2779-2800 | (nscf2779)<br>204740 | (nscf2780)<br>8369 | + | Yes | Breugelmans et al., 2009 |
| BmSPI74 | BGIBMGA006856 | Bowman-Birk             | 11    | 10 | nscf2859      | 732807               | 824065             | + | Yes |                          |
| BmSPI75 | BGIBMGA012631 | $\alpha$ -macroglobulin | 1     | /  | nscf3053      | 468531               | 493450             | - | No  |                          |
| BmSPI76 | BGIBMGA004193 | $\alpha$ -macroglobulin | 1     | 19 | nscf2770      | 1074754              | 1098181            | + | No  |                          |
| BmSPI77 | BGIBMGA004536 | $\alpha$ -macroglobulin | 1     | 27 | nscf2797      | 1139344              | 1159911            | + | No  |                          |
| BmSPI78 | BGIBMGA006306 | $\alpha$ -macroglobulin | 1     | 6  | nscf2852      | 943084               | 952132             | + | Yes |                          |
| BmSPI79 | BGIBMGA006297 | WAP                     | 1     | 6  | nscf2852      | 357420               | 376290             | + | Yes |                          |
| BmSPI80 | BGIBMGA008016 | WAP                     | 2     | 9  | nscf2889      | 1221751              | 1224798            | - | Yes |                          |
