# Supplementary material for: Genome-Wide Identification and Immune Response Analysis of Serine Protease Inhibitor Genes in the Silkworm, Bombyx mori
Source: PubMed Central journal article supplement (PMC3278429; doi:10.1371/journal.pone.0031168), 2012-02-13
Supplement: pone.0031168.s006.pdf [file pone.0031168.s006.pdf]

**Supporting Information Table 2**

Multiple tissues expression data of SPI genes

| Tissue                    | BmSPI74 | BmSPI76 | BmSPI56 | BmSPI27 | BmSPI10 | BmSPI25 | BmSPI6 | BmSPI20 | BmSPI80 | BmSPI70 | BmSPI57 | BmSPI55 | BmSPI66 | BmSPI65 | BmSPI62 | BmSPI64 | BmSPI17 |
|---------------------------|---------|---------|---------|---------|---------|---------|--------|---------|---------|---------|---------|---------|---------|---------|---------|---------|---------|
| Testis-Cy3-1              | -139    | 597     | 371     | 447     | 360     | 1432    | 478    | 127     | 6388    | 6015    | 1997    | 5854    | 1224    | 368     | 1820    | 493     | -28     |
| Testis-Cy5-2              | -260    | 367     | 337     | 413     | 342     | 1504    | 467    | 72      | 7908    | 5998    | 1740    | 5601    | 1385    | 184     | 1248    | 504     | -36     |
| Testis-Cy3-6              | -18     | 421     | 393     | 567     | 332     | 1151    | 860    | 194     | 4819    | 3981    | 1420    | 2867    | 707     | 257     | 1340    | 606     | 72      |
| Testis-Cy5-5              | 0       | 444     | 228     | 585     | 461     | 869     | 569    | 227     | 3894    | 4821    | 1123    | 2025    | 1035    | 164     | 875     | 310     | 112     |
| Testis-Cy3-4              | 18      | 746     | 324     | 1003    | 345     | 2012    | 4393   | 7114    | 4446    | 5888    | 5257    | 2249    | 1670    | 269     | 1596    | 745     | 82      |
| Testis-Cy5-3              | -19     | 621     | 281     | 585     | 196     | 1311    | 2934   | 4748    | 4037    | 4521    | 4085    | 1657    | 1538    | 149     | 985     | 537     | 114     |
| Ovary-Cy5-1               | -41     | 326     | 187     | 684     | 181     | 700     | 217    | 2029    | 4159    | 5541    | 10596   | 20727   | 3023    | 1344    | 369     | -13     | -28     |
| Ovary-Cy3-2               | -110    | 80      | 284     | 604     | 224     | 739     | 291    | 1945    | 4747    | 6095    | 11182   | 23837   | 4549    | 954     | 334     | -36     | -32     |
| Ovary-Cy3-5               | 21      | 252     | 299     | 815     | 337     | 741     | 461    | 1467    | 3128    | 4296    | 11158   | 15436   | 3594    | 595     | 338     | 21      | 93      |
| Ovary-Cy5-6               | 18      | 203     | 288     | 652     | 267     | 621     | 460    | 1461    | 3630    | 3627    | 8688    | 19902   | 2330    | 637     | 394     | 25      | 40      |
| Ovary-Cy5-4               | 18      | 341     | 224     | 710     | 420     | 749     | 3115   | 14220   | 2705    | 2543    | 15278   | 16795   | 4230    | 451     | 617     | 21      | 34      |
| Ovary-Cy3-3               | 30      | 364     | 329     | 661     | 372     | 705     | 3874   | 12736   | 3112    | 2578    | 15821   | 14867   | 5112    | 395     | 620     | 22      | 74      |
| Head-F-Cy5-1              | 193     | 399     | 481     | 108     | 1254    | 622     | 960    | 96      | 334     | 4766    | 19174   | 3070    | 11191   | 3037    | 257     | 9       | 459     |
| Head-F-Cy3-2              | 127     | 66      | 516     | 95      | 1970    | 527     | 766    | 158     | 346     | 5704    | 18740   | 2825    | 21391   | 3901    | 278     | 29      | 204     |
| Head-M-Cy3-1              | 369     | 485     | 650     | 182     | 1789    | 997     | 1893   | 146     | 518     | 5411    | 18477   | 3874    | 13780   | 4186    | 351     | 32      | 553     |
| Head-M-Cy5-2              | 186     | 127     | 678     | 124     | 2593    | 693     | 1437   | 204     | 350     | 8018    | 18374   | 4468    | 27979   | 4078    | 321     | 51      | 284     |
| Integument-F-Cy5-1        | 745     | 311     | 408     | 67      | 3264    | 435     | 395    | 178     | 4961    | 8976    | 5290    | 14448   | 24904   | 845     | 574     | 7       | 52      |
| Integument-M-Cy5-2        | 406     | 485     | 599     | 90      | 3482    | 620     | 852    | 206     | 2653    | 15382   | 10424   | 12944   | 45645   | 708     | 442     | -30     | 171     |
| Integument-F-Cy3-2        | 537     | 261     | 564     | 92      | 2682    | 652     | 434    | 150     | 2414    | 9165    | 6364    | 8620    | 35068   | 610     | 316     | 27      | 118     |
| Integument-M-Cy3-1        | 790     | 534     | 744     | 166     | 4503    | 454     | 862    | 284     | 4683    | 16317   | 8290    | 17890   | 28963   | 818     | 605     | 45      | 167     |
| Fat body-F-Cy5-1          | -10     | 149     | 158     | 106     | 39      | 144     | 51     | 86      | 8020    | 12959   | 12486   | 15360   | 325     | 598     | 189     | 17      | 13      |
| Fat body-M-Cy3-1          | 28      | 223     | 392     | 206     | 143     | 216     | 66     | 133     | 6206    | 17723   | 13271   | 19041   | 1146    | 415     | 329     | 64      | 128     |
| Fat body-M-Cy5-2          | -24     | 141     | 329     | 17      | 95      | 144     | 16     | 122     | 7232    | 14381   | 11040   | 20603   | 730     | 506     | 420     | 10      | 8       |
| Fat body-F-Cy3-2          | -25     | 232     | 330     | 73      | 113     | 208     | 82     | 231     | 9222    | 14454   | 14339   | 20266   | 492     | 1044    | 402     | -3      | 18      |
| Midgut-F-Cy5-1            | -36     | 210     | 305     | -32     | 63      | 445     | 284    | 4890    | 63      | 152     | 4995    | 17      | 210     | 2851    | 464     | -1      | 213     |
| Midgut-M-Cy3-1            | 23      | 230     | 417     | 113     | 115     | 403     | 138    | 3969    | 90      | 140     | 3222    | 104     | 367     | 2113    | 325     | 23      | 159     |
| Midgut-M-Cy5-2            | -50     | 291     | 623     | -54     | 10      | 399     | 135    | 4238    | 88      | 105     | 4082    | 74      | 430     | 1964    | 277     | 44      | 182     |
| Midgut-F-Cy3-2            | 7       | 322     | 810     | 68      | 108     | 627     | 309    | 4631    | 50      | 166     | 4883    | 42      | 556     | 2641    | 405     | 15      | 186     |
| Hemocyte-F-Cy5-1          | -7      | 172     | 181     | 5       | 5       | 346     | 1666   | -14     | 81      | 99      | 27715   | 7343    | 3338    | 1056    | 114     | 14      | 19      |
| Hemocyte-M-Cy3-1          | 10      | 182     | 166     | 29      | 12      | 363     | 1142   | -31     | 77      | 112     | 36782   | 8965    | 5936    | 2404    | 128     | 8       | 12      |
| Hemocyte-M-Cy5-2          | -35     | 149     | 197     | -1      | -24     | 263     | 895    | 0       | 15      | 35      | 31778   | 10534   | 4198    | 2541    | 127     | 28      | -14     |
| Hemocyte-F-Cy3-2          | -18     | 112     | 356     | 13      | 1       | 313     | 1301   | -39     | 19      | 79      | 20486   | 7843    | 2255    | 1220    | 122     | 16      | -28     |
| Malpighian tubule-F-Cy5-1 | -12     | 233     | 220     | 21      | 90      | 233     | 419    | 99      | 172     | 514     | 1175    | 380     | 241     | 272     | 332     | -17     | 30      |
| Malpighian tubule-M-Cy3-1 | -19     | 223     | 372     | 0       | 78      | 524     | 732    | 259     | 85      | 610     | 1102    | 538     | 255     | 143     | 467     | -9      | 22      |
| Malpighian tubule-M-Cy5-2 | 35      | 447     | 414     | 27      | 159     | 755     | 266    | 447     | 137     | 881     | 1568    | 947     | 370     | 310     | 620     | 24      | 79      |
| Malpighian tubule-F-Cy3-2 | 42      | 265     | 457     | -19     | 92      | 272     | 215    | 46      | 165     | 834     | 1295    | 388     | 438     | 153     | 357     | -15     | 42      |
| Malpighian tubule-F-Cy5-3 | -32     | 220     | 395     | 6       | 51      | 311     | 203    | 210     | 160     | 832     | 1210    | 823     | 424     | 703     | 620     | 23      | 15      |
| Malpighian tubule-M-Cy3-3 | 39      | 320     | 458     | 25      | 105     | 654     | 229    | 599     | 176     | 925     | 1195    | 1309    | 492     | 566     | 865     | 20      | 32      |
| Malpighian tubule-M-Cy5-4 | 0       | 469     | 190     | 40      | 241     | 702     | 325    | 503     | 135     | 819     | 1860    | 1208    | 347     | 457     | 922     | 19      | 61      |
| Malpighian tubule-F-Cy3-4 | 97      | 439     | 292     | 200     | 302     | 519     | 374    | 291     | 249     | 996     | 2236    | 828     | 480     | 797     | 868     | 26      | 147     |
| A/MSG-F-Cy5-1             | -16     | 97      | 235     | 28      | 378     | 134     | -62    | -28     | 5       | 18      | 470     | -23     | 85      | 72      | 160     | 23      | 99      |
| A/MSG-M-Cy3-1             | 6       | 186     | 248     | 59      | 560     | 419     | 1      | 6       | 26      | 53      | 469     | 47      | 188     | 128     | 305     | 27      | 212     |

|               |     |     |     |     |     |     |     |     |     |     |     |     |     |     |     |      |      |
|---------------|-----|-----|-----|-----|-----|-----|-----|-----|-----|-----|-----|-----|-----|-----|-----|------|------|
| A/MSG-M-Cy5-2 | -16 | 172 | 348 | 56  | 557 | 396 | -7  | 8   | 13  | 34  | 370 | 38  | 169 | 91  | 237 | 28   | 197  |
| A/MSG-F-Cy3-2 | 20  | 200 | 334 | 68  | 302 | 223 | -25 | 24  | 37  | 49  | 535 | 26  | 223 | 94  | 211 | 56   | 135  |
| A/MSG-M-Cy3-3 | 95  | 252 | 622 | 119 | 575 | 611 | 7   | 28  | 122 | 13  | 780 | 123 | 270 | 213 | 696 | 11   | 135  |
| A/MSG-M-Cy5-4 | 44  | 271 | 396 | 49  | 599 | 641 | 24  | 29  | 70  | 97  | 756 | 37  | 138 | 103 | 608 | 0    | 236  |
| A/MSG-F-Cy5-5 | 14  | 343 | 278 | 92  | 595 | 394 | -5  | 105 | 7   | 28  | 893 | 88  | 194 | 125 | 447 | -2   | 275  |
| A/MSG-M-Cy3-5 | 41  | 324 | 351 | 57  | 522 | 507 | -3  | 39  | 26  | 58  | 702 | 94  | 252 | 141 | 367 | -22  | 320  |
| A/MSG-M-Cy5-6 | 21  | 349 | 162 | 63  | 296 | 542 | 25  | 16  | 24  | 36  | 328 | 83  | 165 | 132 | 434 | 3241 | 234  |
| A/MSG-F-Cy3-6 | 43  | 276 | 327 | 91  | 333 | 464 | -20 | 18  | 54  | 62  | 527 | -30 | 236 | 145 | 354 | 9603 | 5    |
| A/MSG-F-Cy3-4 | 48  | 209 | 397 | 80  | 483 | 457 | 66  | 0   | 75  | 146 | 972 | 154 | 179 | 244 | 707 | 12   | 188  |
| A/MSG-F-Cy5-3 | -15 | 268 | 474 | 38  | 477 | 372 | -23 | 4   | 36  | 88  | 866 | 190 | 196 | 245 | 676 | 21   | 31   |
| PSG-F-Cy5-3   | 37  | 204 | 681 | 18  | 86  | 378 | -25 | -11 | 14  | 1   | 911 | 24  | 220 | 191 | 356 | 18   | 369  |
| PSG-M-Cy5-4   | 62  | 354 | 586 | 52  | 55  | 563 | 8   | -8  | 51  | 23  | 489 | 57  | 228 | 140 | 409 | 15   | 1156 |
| PSG-F-Cy3-4   | 119 | 382 | 711 | 102 | 171 | 576 | 38  | 11  | 90  | 75  | 732 | 95  | 375 | 320 | 530 | 72   | 406  |
| PSG-M-Cy3-1   | 15  | 197 | 368 | 17  | 43  | 240 | 7   | 24  | 32  | 60  | 527 | 74  | 161 | 145 | 337 | 41   | 597  |
| PSG-M-Cy3-3   | 32  | 243 | 659 | 82  | 58  | 358 | -12 | 74  | 24  | 21  | 549 | 47  | 254 | 231 | 349 | 57   | 1518 |
| PSG-M-Cy5-2   | -33 | 163 | 271 | 8   | 16  | 198 | -21 | -19 | 35  | 29  | 358 | 30  | 91  | 137 | 219 | 29   | 2165 |
| PSG-F-Cy3-2   | 11  | 333 | 381 | 66  | 25  | 393 | 30  | 5   | 72  | 200 | 726 | 94  | 139 | 239 | 281 | 54   | 3118 |
| PSG-F-Cy5-1   | -5  | 209 | 350 | 39  | 50  | 277 | -38 | -4  | 16  | 129 | 767 | 169 | 157 | 136 | 209 | 16   | 397  |

Continue

| Tissue             | BmSPI12 | BmSPI9 | BmSPI5 | BmSPI11 | BmSPI4 | BmSPI2 | BmSPI16/18/22 | BmSPI38 | BmSPI36 | BmSPI49 | BmSPI45 | BmSPI48 | BmSPI39 | BmSPI37 | BmSPI46 | BmSPI47 |
|--------------------|---------|--------|--------|---------|--------|--------|---------------|---------|---------|---------|---------|---------|---------|---------|---------|---------|
| Testis-Cy3-1       | 223     | 11024  | 3174   | 1976    | 8453   | 3187   | 214           | 3050    | 1690    | 316     | 510     | 94      | 439     | 80      | -26     | -59     |
| Testis-Cy5-2       | 139     | 10226  | 3170   | 2376    | 6721   | 3276   | 175           | 3768    | 1427    | 324     | 591     | -43     | 324     | 30      | -40     | -154    |
| Testis-Cy3-6       | 295     | 9790   | 1812   | 1902    | 6335   | 2446   | 331           | 2607    | 1300    | 282     | 536     | 175     | 400     | 345     | 167     | 21      |
| Testis-Cy5-5       | 222     | 8757   | 1593   | 2007    | 5177   | 1972   | 221           | 2762    | 1307    | 277     | 553     | 137     | 207     | 147     | 60      | 6       |
| Testis-Cy3-4       | 1068    | 4741   | 3436   | 2265    | 8125   | 2961   | 331           | 654     | 149     | 222     | 1204    | 93      | 336     | 189     | 97      | 38      |
| Testis-Cy5-3       | 873     | 3078   | 2310   | 1790    | 6605   | 2183   | 173           | 604     | 107     | 174     | 903     | 41      | 215     | 95      | 116     | 2       |
| Ovary-Cy5-1        | 660     | 43181  | 7295   | 4162    | 3440   | 3503   | -31           | 14459   | 4532    | 653     | 306     | 298     | 19      | 174     | 68      | 6       |
| Ovary-Cy3-2        | 954     | 41340  | 7892   | 4227    | 3174   | 3648   | -13           | 16592   | 4444    | 801     | 368     | 325     | 8       | 148     | 89      | -74     |
| Ovary-Cy3-5        | 1177    | 33236  | 5315   | 4134    | 2948   | 2762   | 30            | 27876   | 6389    | 1584    | 421     | 1204    | 74      | 358     | 106     | 21      |
| Ovary-Cy5-6        | 1342    | 31674  | 5831   | 4772    | 3403   | 3069   | 29            | 29325   | 5926    | 1551    | 342     | 1196    | 59      | 340     | 79      | -1      |
| Ovary-Cy5-4        | 2666    | 1337   | 5231   | 2875    | 3369   | 2461   | 15            | 3194    | 195     | 316     | 737     | 100     | 25      | 122     | 84      | -3      |
| Ovary-Cy3-3        | 2788    | 1338   | 4886   | 2997    | 3838   | 2696   | 39            | 3596    | 252     | 381     | 696     | 122     | 52      | 138     | 101     | -5      |
| Head-F-Cy5-1       | 3246    | 26391  | 21164  | 17800   | 7344   | 4292   | 10915         | 69207   | 15333   | 3586    | 16758   | 1578    | 570     | 700     | 69      | -1      |
| Head-F-Cy3-2       | 4379    | 40588  | 22819  | 22033   | 11972  | 4072   | 10602         | 101488  | 21750   | 5143    | 21091   | 2006    | 433     | 977     | 90      | 11      |
| Head-M-Cy3-1       | 4127    | 44381  | 25574  | 20342   | 8445   | 4486   | 314           | 55851   | 12971   | 4193    | 1552    | 1981    | 236     | 870     | 99      | -10     |
| Head-M-Cy5-2       | 7076    | 72564  | 26421  | 38004   | 11811  | 5191   | 10            | 132551  | 28680   | 5099    | 642     | 2057    | 58      | 984     | 65      | 29      |
| Integument-F-Cy5-1 | 5895    | 73973  | 31004  | 21729   | 6559   | 3451   | 911           | 40481   | 17336   | 6546    | 866     | 2490    | 128     | 573     | 55      | 31      |
| Integument-M-Cy5-2 | 8572    | 140572 | 31403  | 28466   | 9029   | 5510   | 363           | 75026   | 23630   | 7287    | 713     | 3375    | 201     | 900     | 77      | 38      |
| Integument-F-Cy3-2 | 5318    | 43540  | 24922  | 21528   | 7040   | 3830   | 1269          | 37931   | 20656   | 7318    | 841     | 3373    | 257     | 770     | 65      | 34      |
| Integument-M-Cy3-1 | 7772    | 96172  | 33197  | 22926   | 7764   | 4776   | 409           | 62895   | 19806   | 7494    | 521     | 2910    | 195     | 742     | 89      | 108     |
| Fat body-F-Cy5-1   | 5133    | 70092  | 10022  | 996     | 1186   | 3013   | 20            | 43947   | 14714   | 10899   | 537     | 4816    | 133     | 328     | 10      | -8      |
| Fat body-M-Cy3-1   | 5530    | 91934  | 8889   | 1858    | 1702   | 3335   | 150           | 34612   | 11183   | 10159   | 13899   | 3781    | 568     | 295     | 80      | 35      |
| Fat body-M-Cy5-2   | 5324    | 56029  | 9217   | 1711    | 1585   | 2498   | 138           | 50252   | 10652   | 8578    | 10688   | 2744    | 409     | 297     | 53      | 7       |
| Fat body-F-Cy3-2   | 6636    | 59464  | 15211  | 1455    | 1686   | 3786   | 94            | 54186   | 17236   | 14169   | 3982    | 4925    | 343     | 483     | 56      | 32      |

|                           |      |       |       |       |       |      |       |        |       |       |       |      |      |      |      |      |
|---------------------------|------|-------|-------|-------|-------|------|-------|--------|-------|-------|-------|------|------|------|------|------|
| Midgut-F-Cy5-1            | 68   | 170   | 8630  | 576   | 519   | 8953 | 21    | 115782 | 320   | 359   | 368   | 26   | 59   | 131  | 11   | 5    |
| Midgut-M-Cy3-1            | 119  | 1901  | 7640  | 535   | 585   | 8056 | 35    | 105424 | 491   | 396   | 319   | 81   | 104  | 197  | 37   | 81   |
| Midgut-M-Cy5-2            | 88   | 2110  | 8103  | 467   | 450   | 8825 | 94    | 168432 | 647   | 413   | 691   | 57   | 57   | 243  | -40  | 57   |
| Midgut-F-Cy3-2            | 143  | 198   | 9401  | 571   | 491   | 9034 | 70    | 126848 | 531   | 541   | 836   | 136  | 143  | 329  | 22   | 17   |
| Hemocyte-F-Cy5-1          | 4357 | 482   | 9280  | 10220 | 8739  | 2511 | 43    | 1439   | 129   | 146   | 206   | 3    | 4    | 111  | -1   | -13  |
| Hemocyte-M-Cy3-1          | 6060 | 258   | 11301 | 15601 | 10285 | 2410 | 53    | 542    | 92    | 137   | 248   | 43   | 18   | 157  | 26   | 4    |
| Hemocyte-M-Cy5-2          | 5997 | 101   | 8718  | 10139 | 9945  | 2484 | 24    | 468    | 122   | 93    | 254   | 24   | -16  | 106  | -8   | -72  |
| Hemocyte-F-Cy3-2          | 4341 | 149   | 7410  | 6350  | 9076  | 2659 | 46    | 1202   | 126   | 99    | 227   | 91   | 6    | 112  | -3   | 0    |
| Malpighian tubule-F-Cy5-1 | 3556 | 15093 | 4524  | 911   | 1227  | 1896 | 17    | 22706  | 2208  | 2402  | 1901  | 1058 | 246  | 142  | 34   | -4   |
| Malpighian tubule-M-Cy3-1 | 4266 | 9910  | 5058  | 770   | 1848  | 2465 | 20    | 3505   | 1286  | 3627  | 1568  | 1423 | 158  | 177  | 87   | -17  |
| Malpighian tubule-M-Cy5-2 | 7068 | 15239 | 5582  | 989   | 2491  | 3788 | 71    | 4777   | 1898  | 3903  | 398   | 1373 | 293  | 263  | 35   | -35  |
| Malpighian tubule-F-Cy3-2 | 3782 | 17797 | 4366  | 999   | 1291  | 3071 | 88    | 25873  | 2975  | 2160  | 2733  | 1026 | 518  | 161  | 19   | -34  |
| Malpighian tubule-F-Cy5-3 | 4667 | 16621 | 7948  | 623   | 1862  | 2181 | 49    | 25256  | 2640  | 2030  | 3018  | 658  | 172  | 241  | 28   | -34  |
| Malpighian tubule-M-Cy3-3 | 6173 | 10795 | 8059  | 513   | 2662  | 2484 | 88    | 5073   | 1565  | 3092  | 552   | 890  | 157  | 223  | 54   | 8    |
| Malpighian tubule-M-Cy5-4 | 8023 | 11927 | 7832  | 1638  | 2162  | 3058 | 44    | 4886   | 1955  | 7360  | 744   | 1752 | 126  | 241  | 71   | 10   |
| Malpighian tubule-F-Cy3-4 | 5325 | 18441 | 7218  | 1867  | 1693  | 2584 | 49    | 26405  | 3298  | 5189  | 4130  | 1532 | 292  | 534  | 105  | 111  |
| A/MSG-F-Cy5-1             | 138  | 122   | 2164  | 1322  | 1144  | 1244 | 16163 | 60377  | 21870 | 4939  | 54316 | 764  | 1861 | 5590 | 561  | 1462 |
| A/MSG-M-Cy3-1             | 341  | 662   | 2548  | 1906  | 2001  | 1485 | 30902 | 36113  | 15473 | 28319 | 36100 | 3509 | 3080 | 4559 | 2335 | 6707 |
| A/MSG-M-Cy5-2             | 274  | 574   | 2288  | 1705  | 2073  | 1709 | 29275 | 50508  | 23166 | 21420 | 45042 | 2772 | 2528 | 4725 | 1998 | 5373 |
| A/MSG-F-Cy3-2             | 172  | 167   | 2022  | 1507  | 1441  | 1686 | 16397 | 60834  | 20984 | 5687  | 47380 | 884  | 1649 | 4640 | 722  | 1539 |
| A/MSG-M-Cy3-3             | 79   | 1203  | 3102  | 2601  | 1771  | 2346 | 39286 | 65038  | 28013 | 27273 | 65062 | 3949 | 5518 | 6522 | 3694 | 7837 |
| A/MSG-M-Cy5-4             | 235  | 1254  | 3086  | 2230  | 1747  | 1762 | 47764 | 57546  | 24483 | 23719 | 57581 | 3407 | 6588 | 6025 | 3454 | 6406 |
| A/MSG-F-Cy5-5             | 352  | 246   | 2154  | 1577  | 1627  | 1587 | 37984 | 64822  | 29674 | 13735 | 64691 | 1510 | 3500 | 4974 | 2436 | 3668 |
| A/MSG-M-Cy3-5             | 342  | 798   | 2286  | 1745  | 2195  | 1750 | 38664 | 38925  | 19894 | 26143 | 38912 | 3228 | 3574 | 4344 | 3106 | 6642 |
| A/MSG-M-Cy5-6             | 196  | 373   | 2047  | 729   | 1557  | 2619 | 46932 | 94509  | 23918 | 14973 | 42340 | 2916 | 2475 | 4752 | 1595 | 4370 |
| A/MSG-F-Cy3-6             | 87   | 112   | 2049  | 779   | 1288  | 2619 | 35493 | 74776  | 23278 | 8811  | 36013 | 1850 | 2055 | 4617 | 1610 | 2496 |
| A/MSG-F-Cy3-4             | 219  | 3067  | 2770  | 1317  | 1778  | 1642 | 41174 | 50493  | 16755 | 15800 | 47715 | 2697 | 5112 | 3798 | 3140 | 3163 |
| A/MSG-F-Cy5-3             | 87   | 2540  | 2620  | 1334  | 1464  | 1939 | 48058 | 52154  | 26580 | 19639 | 52184 | 2362 | 5456 | 4725 | 3160 | 3320 |
| PSG-F-Cy5-3               | 49   | 202   | 768   | 448   | 1234  | 1419 | 24770 | 44909  | 15885 | 3777  | 44947 | 910  | 474  | 1230 | 956  | 947  |
| PSG-M-Cy5-4               | 3    | 622   | 975   | 194   | 1097  | 2412 | 10816 | 10428  | 6111  | 3794  | 65892 | 1370 | 378  | 408  | 642  | 1725 |
| PSG-F-Cy3-4               | 104  | 307   | 1067  | 379   | 1080  | 2081 | 27607 | 61311  | 16103 | 3132  | 58414 | 1237 | 563  | 1247 | 790  | 1106 |
| PSG-M-Cy3-1               | 36   | 789   | 814   | 354   | 2979  | 1357 | 10451 | 17181  | 6016  | 3435  | 27003 | 606  | 163  | 365  | 570  | 736  |
| PSG-M-Cy3-3               | 32   | 631   | 723   | 358   | 1650  | 1535 | 8986  | 6872   | 4117  | 5812  | 34516 | 1399 | 395  | 421  | 1031 | 2075 |
| PSG-M-Cy5-2               | 0    | 583   | 723   | 238   | 2232  | 1189 | 9345  | 12011  | 5898  | 2677  | 30466 | 576  | 108  | 425  | 432  | 495  |
| PSG-F-Cy3-2               | 48   | 2987  | 741   | 303   | 1745  | 1353 | 885   | 3609   | 1979  | 1997  | 34461 | 509  | 129  | 254  | 642  | 490  |
| PSG-F-Cy5-1               | 10   | 3314  | 713   | 248   | 2024  | 1379 | 818   | 5220   | 1964  | 1596  | 35282 | 298  | 70   | 172  | 543  | 406  |
