# Supplementary material for: Genome-Wide Identification and Immune Response Analysis of Serine Protease Inhibitor Genes in the Silkworm, Bombyx mori
Source: PubMed Central journal article supplement (PMC3278429; doi:10.1371/journal.pone.0031168), 2012-02-13
Supplement: pone.0031168.s007.pdf [file pone.0031168.s007.pdf]

Supporting Information Table 3

## Developmental expression data of SPI genes

| Developmental stage          | BmSPI61    | BmSPI62  | BmSPI76  | BmSPI72  | BmSPI71  | BmSPI52  | BmSPI53  | BmSPI56  | BmSPI68  | BmSPI27  | BmSPI15  | BmSPI25  | BmSPI6   | BmSPI10  | BmSPI12  | BmSPI9 | BmSPI5  | BmSPI11 | BmSPI4   | BmSPI2   |
|------------------------------|------------|----------|----------|----------|----------|----------|----------|----------|----------|----------|----------|----------|----------|----------|----------|--------|---------|---------|----------|----------|
| day 3 of fifth instar(mix)   | -88.166667 | -88.1667 | -88.1667 | -88.1667 | -88.1667 | -88.1667 | -88.1667 | -88.1667 | -88.1667 | -88.1667 | -88.1667 | -88.1667 | -88.1667 | 330.6667 | 2299.833 | 24849  | 10002.5 | 8567.5  | 3744.333 | 4069.667 |
| day 4 of fifth instar(male)  | -56        | -56      | -56      | -56      | -56      | -56      | -56      | -56      | -56      | -56      | -56      | -56      | -56      | 564      | -56      | 22145  | 4487    | 6340    | 1629     | 2876     |
| day 4 of fifth instar(male)  | -73        | -73      | -73      | -73      | -73      | -73      | -73      | -73      | -73      | -73      | -73      | -73      | -73      | 775      | -73      | 25069  | 2606    | 4804    | 1137     | 2763     |
| day 5 of fifth instar(male)  | -112       | -112     | -112     | -112     | -112     | -112     | -112     | -112     | -112     | -112     | -112     | -112     | -112     | -112     | 1102     | 27556  | 5897    | 9475    | 2880     | 3052     |
| day 5 of fifth instar(male)  | -92        | -92      | -92      | -92      | -92      | -92      | -92      | -92      | -92      | -92      | -92      | -92      | -92      | -92      | 1919     | 32246  | 4791    | 11434   | 3555     | 2284     |
| day 6 of fifth instar(male)  | -109       | -109     | -109     | -109     | -109     | -109     | -109     | -109     | -109     | -109     | -109     | -109     | -109     | 1352     | 2943     | 40927  | 5170    | 5168    | 3199     | 1932     |
| day 6 of fifth instar(male)  | -135       | -135     | -135     | -135     | -135     | -135     | -135     | -135     | -135     | -135     | -135     | -135     | -135     | 1330     | 3036     | 39437  | 6058    | 5159    | 3937     | 1780     |
| day 7 of fifth instar(male)  | -157       | -157     | -157     | -157     | -157     | -157     | -157     | -157     | -157     | -157     | -157     | -157     | -157     | 1417     | 1489     | 14691  | 6718    | 4875    | 3249     | 1949     |
| day 7 of fifth instar(male)  | -87        | -87      | -87      | -87      | -87      | -87      | -87      | -87      | -87      | -87      | -87      | -87      | -87      | 1593     | 1582     | 11890  | 5685    | 6421    | 3204     | 1433     |
| start of wandering(male)     | -116       | -116     | -116     | -116     | -116     | -116     | -116     | -116     | -116     | -116     | -116     | -116     | -116     | 1189     | 4273     | 31016  | 10028   | 8507    | 2893     | 1951     |
| start of wandering(male)     | -72        | -72      | -72      | -72      | -72      | -72      | -72      | -72      | -72      | -72      | -72      | -72      | -72      | 828      | 3354     | 30456  | 12276   | 8421    | 3556     | 2301     |
| 12h after wandering(male)    | -64        | -64      | -64      | -64      | -64      | -64      | -64      | -64      | -64      | -64      | -64      | 611      | 5334     | 1181     | 2540     | 1498   | 13341   | 4342    | 4707     | 1096     |
| 12h after wandering(male)    | -73        | -73      | -73      | -73      | -73      | -73      | -73      | -73      | -73      | -73      | -73      | 879      | 3982     | 1398     | 1950     | 1861   | 18639   | 3722    | 4792     | 1513     |
| 24h after wandering(male)    | -37        | 389      | -37      | -37      | -37      | -37      | -37      | -37      | -37      | 548      | -37      | 660      | 3737     | 483      | 1261     | 1489   | 11221   | 5249    | 4590     | 924      |
| 24h after wandering(male)    | -76        | 396      | -76      | -76      | -76      | -76      | -76      | -76      | -76      | 683      | -76      | 680      | 2255     | 527      | 1139     | 2024   | 14080   | 5044    | 3498     | 1074     |
| 36h after wandering(male)    | -65        | 511      | -65      | -65      | -65      | -65      | -65      | -65      | 3146     | 2941     | -65      | 862      | 3492     | 2096     | 735      | 2764   | 13699   | 12830   | 2193     | 1435     |
| 36h after wandering(male)    | -105       | 718      | -105     | -105     | -105     | -105     | -105     | -105     | 3558     | 3180     | -105     | 1109     | 3782     | 2493     | 657      | 2023   | 15279   | 7819    | 3055     | 1626     |
| 48h after wandering(male)    | -52        | -52      | -52      | -52      | -52      | -52      | -52      | -52      | -52      | -52      | -52      | 972      | 13356    | -52      | 1067     | 1983   | 11691   | 10111   | 4124     | 2109     |
| 48h after wandering(male)    | -98        | -98      | -98      | -98      | -98      | -98      | -98      | -98      | -98      | -98      | -98      | 1168     | 13658    | -98      | 1163     | 2335   | 12742   | 11137   | 4015     | 2076     |
| 60h after wandering(male)    | -66        | -66      | 478      | -66      | -66      | -66      | -66      | -66      | -66      | 466      | -66      | 1471     | 3849     | 645      | 2923     | 3134   | 21593   | 17966   | 4816     | 2695     |
| 60h after wandering(male)    | -54        | -54      | 559      | -54      | -54      | -54      | -54      | -54      | -54      | 544      | -54      | 1223     | 3920     | 485      | 2805     | 2318   | 13742   | 13306   | 5386     | 2781     |
| 72h after wandering(male)    | -198       | -198     | -198     | -198     | -198     | -198     | -198     | -198     | -198     | -198     | -198     | -198     | -198     | -198     | 1232     | 4343   | 9463    | 3452    | 3345     | 1424     |
| 72h after wandering(male)    | -126       | -126     | -126     | -126     | -126     | -126     | -126     | -126     | -126     | -126     | -126     | -126     | -126     | -126     | 1312     | 3713   | 10023   | 3746    | 4157     | 1453     |
| 96h after wandering(male)    | -91        | -91      | -91      | -91      | -91      | -91      | -91      | -91      | -91      | 917      | -91      | 1169     | 1176     | 2187     | 1583     | 8448   | 8790    | 3347    | 3367     | 1580     |
| 96h after wandering(male)    | -79        | -79      | -79      | -79      | -79      | -79      | -79      | -79      | -79      | 1032     | -79      | 1358     | 1755     | 2360     | 1789     | 7102   | 8387    | 3802    | 3588     | 1332     |
| 120h after wandering(male)   | -134       | 574      | -134     | -134     | -134     | -134     | -134     | -134     | 1174     | 7489     | -134     | 940      | 1837     | 16458    | 2447     | 6956   | 8241    | 1699    | 4308     | 1273     |
| 120h after wandering(male)   | -55        | 493      | -55      | -55      | -55      | -55      | -55      | -55      | 991      | 7439     | -55      | 1294     | 2168     | 18222    | 2016     | 6422   | 8960    | 1774    | 4517     | 1054     |
| day 6 after wandering(male)  | -66        | -66      | 503      | -66      | 1895     | -66      | -66      | 1288     | 3446     | 3599     | -66      | 2231     | 9684     | 18592    | 1709     | 3574   | 8626    | 2350    | 3331     | 1810     |
| day 6 after wandering(male)  | -87        | -87      | 834      | -87      | 1584     | -87      | -87      | 912      | 3936     | 1975     | -87      | 1584     | 7107     | 15137    | 1227     | 2798   | 5775    | 1340    | 2716     | 2835     |
| day 7 after wandering(male)  | -293       | -293     | -293     | -293     | -293     | -293     | -293     | 1219     | -293     | -293     | -293     | -293     | 14991    | 3902     | 11484    | 2697   | 8209    | 1665    | 3219     | 1624     |
| day 7 after wandering(male)  | -87        | -87      | -87      | -87      | -87      | -87      | -87      | 893      | -87      | -87      | -87      | -87      | 16252    | 2069     | 7388     | 1924   | 6950    | 1030    | 1920     | 1391     |
| day 8 after wandering(male)  | -346       | -346     | -346     | -346     | 5121     | -346     | -346     | -346     | -346     | -346     | -346     | -346     | 2049     | 3864     | 1513     | 3964   | 5194    | 2894    | 2794     | 1696     |
| day 8 after wandering(male)  | -146       | -146     | -146     | -146     | 5363     | -146     | -146     | -146     | -146     | -146     | -146     | -146     | 2870     | 2503     | 1629     | 4569   | 6128    | 4841    | 3111     | 1891     |
| day 9 after wandering(male)  | -283       | -283     | -283     | -283     | 13802    | 2791     | 2130     | -283     | -283     | -283     | -283     | -283     | 4774     | -283     | 1447     | 3445   | 8041    | 4760    | 3986     | -283     |
| day 9 after wandering(male)  | -117       | -117     | -117     | -117     | 11010    | 2178     | 1821     | -117     | -117     | -117     | -117     | -117     | 6271     | -117     | 1672     | 3299   | 8963    | 5853    | 3900     | -117     |
| day 10 after wandering(male) | -88        | 475      | 823      | -88      | 30559    | 14489    | 1619     | 1466     | -88      | -88      | 1377     | 1420     | 963      | 6148     | -88      | 982    | 4207    | 13966   | 495      | 3025     |
| day 10 after wandering(male) | -83        | 542      | 1040     | -83      | 42519    | 827      | 8129     | 2056     | -83      | -83      | 831      | 1887     | 1058     | 5671     | -83      | 1366   | 4692    | 5866    | 4152     | 4426     |
| adult(male)                  | 1073       | -146     | -146     | -146     | 15290    | 15540    | 7021     | -146     | -146     | -146     | -146     | 2004     | 1608     | 4500     | 4671     | 2902   | 6364    | 17490   | 9176     | 1470     |
| adult(male)                  | 1041       | -109     | -109     | -109     | 17648    | 16977    | 8344     | -109     | -109     | -109     | -109     | 2515     | 1780     | 3049     | 3802     | 4243   | 9210    | 19049   | 8985     | 1628     |

| Developmental stage         | BmSPI80 | BmSPI79  | BmSPI70  | BmSPI57 | BmSPI55  | BmSPI65  | BmSPI66  | BmSPI38 | BmSPI36 | BmSPI45  | BmSPI49  | BmSPI37  | BmSPI47  | BmSPI39  | BmSPI46  | BmSPI48 | BmSPI3   | BmSPI17  | BmSPI24  | BmSPI16/18/22 |
|-----------------------------|---------|----------|----------|---------|----------|----------|----------|---------|---------|----------|----------|----------|----------|----------|----------|---------|----------|----------|----------|---------------|
| day 3 of fifth instar(mix)  | 2788    | -88.1667 | 7540.333 | 4963.5  | 9259.833 | 2834.833 | 10676.67 | 37563   | 21284   | 11939.17 | 9975.833 | 689.3333 | -88.1667 | -88.1667 | -88.1667 | 3050    | -88.1667 | -88.1667 | -88.1667 | 20325.33      |
| day 4 of fifth instar(male) | 1947    | -56      | 5516     | 5806    | 4654     | 1638     | 12811    | 37194   | 18412   | 37265    | 5000     | 1970     | 1220     | 2217     | -56      | 1250    | 1311     | -56      | 1862     | 33235         |
| day 4 of fifth instar(male) | 1275    | -73      | 8977     | 3841    | 5474     | 2227     | 13896    | 47648   | 29845   | 47627    | 3343     | 1765     | 1108     | 1622     | -73      | 874     | 2008     | -73      | 2772     | 36382         |
| day 5 of fifth instar(male) | -112    | -112     | 7228     | 3250    | 2762     | 1936     | 12800    | 44140   | 17439   | 62765    | 5792     | 2508     | 6668     | 3751     | 1938     | 1536    | -112     | 1015     | 2718     | 32708         |
| day 5 of fifth instar(male) | -92     | -92      | 6126     | 4937    | 2911     | 1834     | 16953    | 34738   | 14088   | 60424    | 5476     | 1760     | 6203     | 4383     | 2259     | 885     | -92      | 3740     | 1954     | 22500         |
| day 6 of fifth instar(male) | -109    | -109     | 8538     | 2725    | 2651     | 3958     | 19172    | 21715   | 10682   | 71567    | 2550     | 3851     | 7692     | 12232    | 1624     | -109    | -109     | 3229     | 6112     | 9765          |
| day 6 of fifth instar(male) | -135    | -135     | 6362     | 2940    | 2463     | 3781     | 15776    | 14094   | 8437    | 88333    | 2725     | 4045     | 10984    | 14614    | 1844     | -135    | -135     | 2436     | 6671     | 7926          |
| day 7 of fifth instar(male) | -157    | -157     | 2611     | 1781    | 1810     | 1347     | 8835     | 38455   | 7811    | 50844    | 1263     | 2484     | 7530     | 6225     | 1715     | -157    | -157     | 1404     | 3644     | 11803         |
| day 7 of fifth instar(male) | -87     | -87      | 2343     | 2046    | 2089     | 1233     | 7881     | 30721   | 5023    | 56708    | 1263     | 1818     | 5870     | 9117     | 2369     | -87     | -87      | 1798     | 3536     | 11368         |
| start of wandering(male)    | 1754    | -116     | 1742     | 2188    | 4607     | 1511     | 7644     | 42286   | 7694    | 39350    | 4018     | 1927     | 5255     | 5238     | -116     | 1204    | -116     | 2370     | 2123     | 18023         |
| start of wandering(male)    | 1900    | -72      | 1426     | 3199    | 4679     | 1813     | 5163     | 33077   | 5457    | 41391    | 4245     | 1735     | 5145     | 4982     | -72      | 1115    | -72      | 3721     | 1639     | 19843         |
| 12h after wandering(male)   | 1035    | -64      | -64      | 1208    | 1310     | 816      | 14267    | 3492    | 1219    | 3689     | 1291     | -64      | 4221     | 708      | 557      | -64     | -64      | -64      | 872      | -64           |

|                               |      |      |      |       |       |      |       |       |      |      |      |      |       |      |      |      |      |      |      |      |
|-------------------------------|------|------|------|-------|-------|------|-------|-------|------|------|------|------|-------|------|------|------|------|------|------|------|
| 12h after wandering (male)    | 1530 | -73  | -73  | 790   | 1617  | 1451 | 12086 | 3784  | 2016 | 3433 | 942  | -73  | 2834  | 823  | 413  | -73  | -73  | -73  | 817  | -73  |
| 24h after wandering (male)    | 1274 | 2932 | 673  | 3554  | 4607  | -37  | 18491 | 2678  | 1529 | 5606 | 1188 | -37  | 12582 | 951  | 639  | -37  | -37  | -37  | 585  | -37  |
| 24h after wandering (male)    | 946  | 3628 | 626  | 3441  | 4034  | -76  | 16648 | 3433  | 1574 | 4480 | 959  | -76  | 9538  | 584  | 351  | -76  | -76  | -76  | 583  | -76  |
| 36h after wandering (male)    | 1662 | 4608 | 671  | 5045  | 6563  | 547  | 13816 | 3180  | 1488 | 2915 | 882  | -65  | 6964  | 718  | -65  | -65  | -65  | -65  | -65  | -65  |
| 36h after wandering (male)    | 1789 | 5476 | 802  | 5046  | 7177  | 771  | 10599 | 3108  | 1283 | 2667 | 894  | -105 | 8900  | 802  | -105 | -105 | -105 | -105 | -105 | -105 |
| 48h after wandering (male)    | 1335 | 3363 | -52  | 7058  | 5779  | 500  | 13904 | 3465  | 2354 | 1339 | 954  | 897  | 828   | 2081 | -52  | -52  | -52  | -52  | -52  | -52  |
| 48h after wandering (male)    | 1245 | 3576 | -98  | 6432  | 6418  | 583  | 19205 | 3957  | 2835 | 1777 | 991  | 855  | 855   | 2004 | -98  | -98  | -98  | -98  | -98  | -98  |
| 60h after wandering (male)    | 1074 | 4936 | 1369 | 12365 | 11225 | 3111 | 11499 | 4223  | 1803 | 1700 | 855  | 487  | -66   | 941  | -66  | -66  | -66  | -66  | -66  | -66  |
| 60h after wandering (male)    | 505  | 3829 | 1645 | 8221  | 12592 | 3782 | 14602 | 3916  | 1893 | 1487 | 1028 | 702  | -54   | 928  | -54  | -54  | -54  | -54  | -54  | -54  |
| 72h after wandering (male)    | 1212 | 1712 | 1694 | 5558  | 3301  | -198 | 28236 | 6066  | 3506 | -198 | -198 | -198 | -198  | -198 | -198 | -198 | -198 | -198 | -198 | -198 |
| 72h after wandering (male)    | 1424 | 1496 | 1624 | 7782  | 2940  | -126 | 25751 | 4127  | 2724 | -126 | -126 | -126 | -126  | -126 | -126 | -126 | -126 | -126 | -126 | -126 |
| 96h after wandering (male)    | 735  | 1329 | 1230 | 10963 | 3676  | -91  | 22528 | 3283  | 2679 | 1398 | -91  | -91  | -91   | -91  | -91  | -91  | -91  | -91  | -91  | -91  |
| 96h after wandering (male)    | 1001 | 1316 | 1191 | 14033 | 4299  | -79  | 26067 | 3119  | 2711 | 1135 | -79  | -79  | -79   | -79  | -79  | -79  | -79  | -79  | -79  | -79  |
| 120h after wandering (male)   | 525  | 2252 | 3150 | 12612 | -134  | -134 | 17473 | 4235  | 2718 | 1263 | -134 | -134 | -134  | -134 | -134 | -134 | -134 | -134 | -134 | -134 |
| 120h after wandering (male)   | 846  | 2519 | 3068 | 15775 | -55   | -55  | 20950 | 2417  | 2170 | 1091 | -55  | -55  | -55   | -55  | -55  | -55  | -55  | -55  | -55  | -55  |
| day 6 after wandering (male)  | 1045 | 2883 | 1417 | 15885 | 19589 | 1143 | 6204  | 3141  | 1286 | 1852 | -66  | -66  | -66   | -66  | -66  | -66  | -66  | -66  | -66  | -66  |
| day 6 after wandering (male)  | 599  | 1492 | 1108 | 10287 | 16801 | 1176 | 5174  | 4156  | 1671 | 2259 | -87  | -87  | -87   | -87  | -87  | -87  | -87  | -87  | -87  | -87  |
| day 7 after wandering (male)  | -293 | 7209 | 2891 | 10379 | 4386  | 2706 | 22184 | 3175  | 4802 | -293 | -293 | -293 | -293  | -293 | -293 | -293 | -293 | -293 | -293 | -293 |
| day 7 after wandering (male)  | -87  | 5336 | 2007 | 8711  | 2860  | 2887 | 12582 | 3405  | 2860 | -87  | -87  | -87  | -87   | -87  | -87  | -87  | -87  | -87  | -87  | -87  |
| day 8 after wandering (male)  | -346 | -346 | -346 | 12496 | 13902 | -346 | 4037  | 5284  | 3275 | 2707 | -346 | -346 | -346  | -346 | -346 | -346 | -346 | -346 | -346 | -346 |
| day 8 after wandering (male)  | -146 | -146 | -146 | 14516 | 15404 | -146 | 4672  | 5317  | 3191 | 2708 | -146 | -146 | -146  | -146 | -146 | -146 | -146 | -146 | -146 | -146 |
| day 9 after wandering (male)  | 1362 | 2074 | 2907 | 9764  | 15743 | -283 | 7911  | 4247  | 5372 | 2009 | -283 | -283 | -283  | -283 | -283 | -283 | -283 | -283 | -283 | -283 |
| day 9 after wandering (male)  | 1406 | 1889 | 2302 | 13352 | 16098 | -117 | 9404  | 4668  | 2859 | 2050 | -117 | -117 | -117  | -117 | -117 | -117 | -117 | -117 | -117 | -117 |
| day 10 after wandering (male) | 4467 | 391  | 4667 | 28215 | 675   | 2290 | 7014  | 528   | 2363 | 1618 | 3707 | 556  | -88   | -88  | -88  | 1679 | -88  | -88  | -88  | 1009 |
| day 10 after wandering (male) | 1612 | 521  | 9166 | 13998 | 21012 | 2137 | 7184  | 4603  | 3199 | 1527 | 1984 | 588  | -83   | -83  | -83  | 1340 | -83  | -83  | -83  | 719  |
| adult (male)                  | 7769 | -146 | 6631 | 95483 | 15774 | 3974 | 7515  | 8938  | 2103 | 1749 | 4518 | 858  | -146  | -146 | -146 | 828  | -146 | -146 | -146 | -146 |
| adult (male)                  | 9497 | -109 | 5756 | 71369 | 12808 | 5504 | 5143  | 10384 | 2123 | 1893 | 5203 | 869  | -109  | -109 | -109 | 1259 | -109 | -109 | -109 | -109 |

| Developmental stage            | BmSPI61    | BmSPI62  | BmSPI76  | BmSPI72  | BmSPI71  | BmSPI52  | BmSPI53  | BmSPI56  | BmSPI68  | BmSPI27  | BmSPI15  | BmSPI25  | BmSPI6   | BmSPI10  | BmSPI12  | BmSPI9 | BmSPI5  | BmSPI11 | BmSPI4   | BmSPI2   |      |      |
|--------------------------------|------------|----------|----------|----------|----------|----------|----------|----------|----------|----------|----------|----------|----------|----------|----------|--------|---------|---------|----------|----------|------|------|
| day 3 of fifth instar (mix)    | -88.166667 | -88.1667 | -88.1667 | -88.1667 | -88.1667 | -88.1667 | -88.1667 | -88.1667 | -88.1667 | -88.1667 | -88.1667 | -88.1667 | -88.1667 | 330.6667 | 2299.833 | 24849  | 10002.5 | 8567.5  | 3744.333 | 4069.667 |      |      |
| day 4 of fifth instar (female) | -73        | -73      | -73      | -73      | -73      | -73      | -73      | -73      | -73      | -73      | 472      | -73      | -73      | 942      | 2073     | 27709  | 3015    | 7038    | 1811     | 2031     |      |      |
| day 4 of fifth instar (female) | -80        | -80      | -80      | -80      | -80      | -80      | -80      | -80      | -80      | -80      | 747      | -80      | -80      | 1014     | 1762     | 33016  | 4579    | 5245    | 2774     | 2806     |      |      |
| day 5 of fifth instar (female) | -113       | -113     | -113     | -113     | -113     | -113     | -113     | -113     | -113     | -113     | -113     | -113     | -113     | 425      | 1304     | 28648  | 3558    | 8777    | 2532     | 3324     |      |      |
| day 5 of fifth instar (female) | -83        | -83      | -83      | -83      | -83      | -83      | -83      | -83      | -83      | -83      | -83      | -83      | -83      | 512      | 1266     | 26181  | 4023    | 7510    | 2273     | 3864     |      |      |
| day 6 of fifth instar (female) | -143       | -143     | -143     | -143     | -143     | -143     | -143     | -143     | -143     | -143     | -143     | -143     | -143     | 2750     | 5327     | 44044  | 8132    | 5111    | 3979     | 1763     |      |      |
| day 6 of fifth instar (female) | -128       | -128     | -128     | -128     | -128     | -128     | -128     | -128     | -128     | -128     | -128     | -128     | -128     | 1890     | 5649     | 39508  | 8078    | 3859    | 4410     | 2248     |      |      |
| day 7 of fifth instar (female) | -131       | -131     | -131     | -131     | -131     | -131     | -131     | -131     | -131     | -131     | -131     | -131     | 1047     | 1866     | 5101     | 9820   | 5894    | 3508    | 2090     | 881      |      |      |
| day 7 of fifth instar (female) | -145       | -145     | -145     | -145     | -145     | -145     | -145     | -145     | -145     | -145     | -145     | -145     | 1092     | 1266     | 2755     | 6678   | 5582    | 2536    | 2271     | 1708     |      |      |
| start of wandering (female)    | -66        | 338      | -66      | -66      | -66      | -66      | -66      | -66      | -66      | -66      | -66      | -66      | -66      | 936      | 4219     | 9062   | 10388   | 5819    | 1900     | 1879     |      |      |
| start of wandering (female)    | -67        | 608      | -67      | -67      | -67      | -67      | -67      | -67      | -67      | -67      | -67      | -67      | -67      | 1693     | 5254     | 10688  | 16063   | 7930    | 2186     | 1799     |      |      |
| 12h after wandering (female)   | -104       | -104     | -104     | -104     | -104     | -104     | -104     | -104     | -104     | -104     | -104     | 473      | 2381     | 655      | 1051     | 1729   | 12079   | 5080    | 3452     | 1198     |      |      |
| 12h after wandering (female)   | -76        | -76      | -76      | -76      | -76      | -76      | -76      | -76      | -76      | -76      | -76      | 592      | 3030     | 949      | 1782     | 1679   | 11015   | 6514    | 3387     | 906      |      |      |
| 24h after wandering (female)   | -196       | -196     | -196     | -196     | -196     | -196     | -196     | -196     | -196     | -196     | 888      | -196     | 1146     | 2896     | -196     | 1846   | 2778    | 29964   | 10500    | 3991     | 1456 |      |
| 24h after wandering (female)   | -42        | -42      | -42      | -42      | -42      | -42      | -42      | -42      | -42      | -42      | 653      | -42      | 672      | 3231     | -42      | 1915   | 1595    | 16238   | 7756     | 3831     | 1095 |      |
| 36h after wandering (female)   | -161       | -161     | -161     | -161     | -161     | -161     | -161     | -161     | -161     | 4770     | 3213     | -161     | -161     | 5931     | 5779     | -161   | 2053    | 13792   | 8905     | 2040     | 1343 |      |
| 36h after wandering (female)   | -116       | -116     | -116     | -116     | -116     | -116     | -116     | -116     | -116     | 2935     | 3677     | -116     | -116     | 8087     | 3973     | -116   | 2018    | 14073   | 8989     | 2119     | 1158 |      |
| 48h after wandering (female)   | -127       | -127     | -127     | -127     | -127     | -127     | -127     | -127     | -127     | -127     | -127     | -127     | -127     | 10445    | 1144     | -127   | 2526    | 16029   | 16814    | 4446     | 2216 |      |
| 48h after wandering (female)   | -251       | -251     | -251     | -251     | -251     | -251     | -251     | -251     | -251     | -251     | -251     | -251     | -251     | 9994     | 1638     | -251   | 2488    | 20166   | 18075    | 4061     | 2264 |      |
| 60h after wandering (female)   | -61        | 540      | -61      | 391      | -61      | -61      | -61      | -61      | -61      | -61      | 644      | -61      | 1494     | 1780     | 514      | 1893   | 3319    | 16178   | 18256    | 3362     | 2254 |      |
| 60h after wandering (female)   | -50        | 556      | -50      | 451      | -50      | -50      | -50      | -50      | -50      | -50      | 640      | -50      | 1393     | 1679     | 489      | 1701   | 2709    | 14857   | 17963    | 3502     | 2948 |      |
| 72h after wandering (female)   | -183       | -183     | -183     | -183     | -183     | -183     | -183     | -183     | -183     | -183     | -183     | -183     | -183     | 999      | 1134     | 1969   | 1588    | 4014    | 8953     | 3860     | 2866 | 1080 |
| 72h after wandering (female)   | -74        | -74      | -74      | -74      | -74      | -74      | -74      | -74      | -74      | -74      | -74      | -74      | -74      | 1202     | 1582     | 1906   | 1630    | 3331    | 9601     | 3759     | 3590 | 1189 |
| 96h after wandering (female)   | -261       | -261     | -261     | -261     | -261     | -261     | -261     | -261     | -261     | -261     | 1359     | -261     | -261     | 1898     | -261     | 5342   | 5860    | 3818    | 2685     | 1216     |      |      |
| 96h after wandering (female)   | -119       | -119     | -119     | -119     | -119     | -119     | -119     | -119     | -119     | -119     | 1594     | -119     | -119     | 2036     | -119     | 7314   | 6592    | 2587    | 3529     | 1101     |      |      |
| 120h after wandering (female)  | -77        | -77      | -77      | -77      | -77      | -77      | -77      | -77      | -77      | 782      | 5685     | -77      | 766      | 1586     | 13874    | 2269   | 6141    | 6813    | 1357     | 2554     | 858  |      |
| 120h after wandering (female)  | -102       | -102     | -102     | -102     | -102     | -102     | -102     | -102     | -102     | 786      | 5047     | -102     | 797      | 1513     | 15436    | 1650   | 4533    | 8221    | 1615     | 3078     | 1134 |      |

|                                |      |      |      |      |      |      |      |      |      |      |      |      |      |       |      |      |      |      |      |      |
|--------------------------------|------|------|------|------|------|------|------|------|------|------|------|------|------|-------|------|------|------|------|------|------|
| day 6 after wandering(female)  | -67  | -67  | -67  | -67  | 1146 | 480  | -67  | -67  | -67  | 1609 | -67  | 1436 | 1997 | 3727  | 1961 | 2377 | 6870 | 1612 | 2403 | 1478 |
| day 6 after wandering(female)  | -60  | -60  | -60  | -60  | 1995 | 651  | -60  | -60  | -60  | 1415 | -60  | 1104 | 2241 | 3058  | 1727 | 1617 | 4955 | 1799 | 2282 | 1158 |
| day 7 after wandering(female)  | -227 | -227 | -227 | -227 | -227 | -227 | -227 | -227 | 2240 | 1226 | -227 | -227 | 2918 | 16860 | 1753 | 2065 | 3549 | -227 | 2234 | 1135 |
| day 7 after wandering(female)  | -84  | -84  | -84  | -84  | -84  | -84  | -84  | -84  | 1189 | 796  | -84  | -84  | 2720 | 10741 | 1186 | 1339 | 3042 | -84  | 2196 | 1549 |
| day 8 after wandering(female)  | -97  | -97  | -97  | -97  | -97  | -97  | -97  | -97  | -97  | -97  | -97  | 516  | 1106 | -97   | 1159 | 1824 | 3329 | 1447 | 1873 | 1260 |
| day 8 after wandering(female)  | -90  | -90  | -90  | -90  | -90  | -90  | -90  | -90  | -90  | -90  | -90  | 610  | 1505 | -90   | 1252 | 2006 | 3432 | 1660 | 1680 | 1602 |
| day 9 after wandering(female)  | -141 | -141 | -141 | -141 | -141 | -141 | -141 | 805  | -141 | -141 | -141 | -141 | -141 | 1643  | -141 | 3001 | 4626 | 2016 | 2390 | 1464 |
| day 9 after wandering(female)  | -96  | -96  | -96  | -96  | -96  | -96  | -96  | 848  | -96  | -96  | -96  | -96  | -96  | 1404  | -96  | 1977 | 5359 | 1466 | 2114 | 2165 |
| day 10 after wandering(female) | -87  | -87  | 544  | -87  | -87  | -87  | -87  | 997  | -87  | -87  | 570  | 967  | 279  | 3882  | -87  | 690  | 2927 | 1593 | 1100 | 3024 |
| day 10 after wandering(female) | -100 | -100 | 762  | -100 | -100 | -100 | -100 | 1998 | -100 | -100 | 681  | 1149 | 560  | 1729  | -100 | 1371 | 3211 | 1707 | 1931 | 5342 |
| adult(female)                  | -88  | 1162 | 866  | -88  | -88  | -88  | -88  | -88  | -88  | -88  | -88  | 2874 | 3002 | 2817  | 5838 | 2578 | 6495 | 9025 | 4673 | 2792 |
| adult(female)                  | -155 | 865  | 840  | -155 | -155 | -155 | -155 | -155 | -155 | -155 | -155 | 1950 | 2410 | 1922  | 4371 | 3090 | 5959 | 9501 | 4152 | 3352 |

| Developmental stage            | BmSPI80 | BmSPI79  | BmSPI70  | BmSPI57 | BmSPI55  | BmSPI65  | BmSPI66  | BmSPI38 | BmSPI36 | BmSPI45  | BmSPI49  | BmSPI37  | BmSPI47  | BmSPI39  | BmSPI46  | BmSPI48 | BmSPI3   | BmSPI17  | BmSPI24  | BmSPI16/18/22 |
|--------------------------------|---------|----------|----------|---------|----------|----------|----------|---------|---------|----------|----------|----------|----------|----------|----------|---------|----------|----------|----------|---------------|
| day 3 of fifth instar(mix)     | 2788    | -88.1667 | 7540.333 | 4963.5  | 9259.833 | 2834.833 | 10676.67 | 37563   | 21284   | 11939.17 | 9975.833 | 689.3333 | -88.1667 | -88.1667 | -88.1667 | 3050    | -88.1667 | -88.1667 | -88.1667 | 20325.33      |
| day 4 of fifth instar(female)  | 799     | -73      | 3184     | 3194    | 2964     | 1152     | 13634    | 48245   | 15190   | 48404    | 3022     | 1803     | 2972     | 1383     | 1229     | 924     | 1887     | 2563     | 2482     | 35258         |
| day 4 of fifth instar(female)  | 1118    | -80      | 3370     | 3035    | 4633     | 2644     | 10835    | 52556   | 16985   | 52519    | 2582     | 2150     | 2846     | 1511     | 1223     | 1098    | 3792     | 3176     | 3347     | 36849         |
| day 5 of fifth instar(female)  | 885     | -113     | 3418     | 3066    | 3073     | 1311     | 11992    | 72232   | 21549   | 62246    | 4876     | 2115     | -113     | 2854     | 1499     | 1069    | -113     | 879      | -113     | 25309         |
| day 5 of fifth instar(female)  | 1644    | -83      | 2569     | 4326    | 3510     | 1094     | 7372     | 42905   | 16188   | 44021    | 4152     | 1517     | -83      | 2655     | 1420     | 774     | -83      | 2125     | -83      | 15738         |
| day 6 of fifth instar(female)  | 1032    | -143     | 6752     | 1694    | 4124     | 3628     | 29495    | 93593   | 19010   | 63946    | 2269     | 6077     | 5731     | 6010     | 1241     | -143    | -143     | -143     | 5201     | 29336         |
| day 6 of fifth instar(female)  | 1518    | -128     | 5801     | 2150    | 4155     | 4563     | 26723    | 82193   | 15232   | 51341    | 1948     | 4661     | 6227     | 7085     | 1053     | -128    | -128     | -128     | 6136     | 26175         |
| day 7 of fifth instar(female)  | -131    | -131     | 1272     | 1340    | 2163     | 5514     | -131     | 17539   | 4475    | 16286    | -131     | 3707     | 5097     | 10044    | -131     | -131    | -131     | -131     | 2230     | 2187          |
| day 7 of fifth instar(female)  | -145    | -145     | 1009     | 1786    | 2253     | 3502     | -145     | 7094    | 4068    | 10893    | -145     | 2999     | 4394     | 12883    | -145     | -145    | -145     | -145     | 2413     | 1854          |
| start of wandering(female)     | 1135    | 532      | 839      | 2053    | 3784     | 1435     | 3598     | 19534   | 3952    | 27157    | 2032     | 2084     | 2880     | 14727    | 453      | 515     | -66      | 1856     | 1339     | 1632          |
| start of wandering(female)     | 1403    | 764      | 1167     | 2883    | 3632     | 1918     | 6306     | 16188   | 4008    | 33295    | 2537     | 1645     | 2863     | 9789     | 621      | 608     | -67      | 2337     | 1780     | 1837          |
| 12h after wandering(female)    | 888     | 1445     | 529      | 1198    | 2090     | 703      | 12931    | 2954    | 1813    | -104     | 1589     | 469      | 5565     | 1424     | 571      | -104    | -104     | 438      | 531      | -104          |
| 12h after wandering(female)    | 1174    | 1610     | 453      | 1809    | 1766     | 637      | 14551    | 2567    | 1753    | -76      | 2087     | 375      | 5382     | 1380     | 727      | -76     | -76      | 1252     | 785      | -76           |
| 24h after wandering(female)    | 1946    | 7885     | -196     | 6602    | 6832     | 967      | 12390    | 2732    | 1378    | 7706     | 2783     | -196     | 19255    | -196     | -196     | -196    | -196     | -196     | -196     | -196          |
| 24h after wandering(female)    | 1311    | 4449     | -42      | 4869    | 5355     | 712      | 25602    | 1833    | 1073    | 6805     | 1569     | -42      | 11963    | -42      | -42      | -42     | -42      | -42      | -42      | -42           |
| 36h after wandering(female)    | 1424    | 4961     | -161     | 4556    | 10722    | 1013     | 10192    | 3127    | 1361    | 2100     | 1152     | -161     | 6979     | -161     | -161     | -161    | -161     | -161     | -161     | -161          |
| 36h after wandering(female)    | 2173    | 5177     | -116     | 5944    | 12572    | 979      | 8617     | 2108    | 843     | 2276     | 1237     | -116     | 8330     | -116     | -116     | -116    | -116     | -116     | -116     | -116          |
| 48h after wandering(female)    | 1150    | 2839     | -127     | 10075   | 7261     | -127     | 21352    | 4293    | 3405    | 1365     | -127     | -127     | -127     | -127     | -127     | -127    | -127     | -127     | -127     | -127          |
| 48h after wandering(female)    | 1347    | 4899     | -251     | 10755   | 12580    | -251     | 31012    | 5348    | 2991    | 1249     | -251     | -251     | -251     | -251     | -251     | -251    | -251     | -251     | -251     | -251          |
| 60h after wandering(female)    | 1875    | 4862     | 1471     | 19829   | 14507    | 3229     | 20208    | 4042    | 1675    | 1783     | 515      | -61      | -61      | -61      | -61      | -61     | -61      | -61      | -61      | -61           |
| 60h after wandering(female)    | 1492    | 4062     | 1271     | 17965   | 15769    | 3414     | 15935    | 3598    | 1603    | 1528     | 785      | -50      | -50      | -50      | -50      | -50     | -50      | -50      | -50      | -50           |
| 72h after wandering(female)    | 1081    | 2020     | -183     | 8757    | 3749     | -183     | 27893    | 5422    | 1815    | 981      | -183     | -183     | -183     | -183     | -183     | -183    | -183     | -183     | -183     | -183          |
| 72h after wandering(female)    | 1615    | 1840     | -74      | 11284   | 3461     | -74      | 24584    | 4516    | 1714    | 1059     | -74      | -74      | -74      | -74      | -74      | -74     | -74      | -74      | -74      | -74           |
| 96h after wandering(female)    | -261    | 1422     | -261     | 14843   | 4443     | -261     | 25337    | 3420    | 3067    | -261     | -261     | -261     | -261     | -261     | -261     | -261    | -261     | -261     | -261     | -261          |
| 96h after wandering(female)    | -119    | 1529     | -119     | 12927   | 5817     | -119     | 16374    | 2966    | 2910    | -119     | -119     | -119     | -119     | -119     | -119     | -119    | -119     | -119     | -119     | -119          |
| 120h after wandering(female)   | 689     | 1949     | 1250     | 13025   | 6039     | -77      | 23579    | 2954    | 2378    | 783      | -77      | -77      | -77      | -77      | -77      | -77     | -77      | -77      | -77      | -77           |
| 120h after wandering(female)   | 677     | 2019     | 1304     | 12208   | 5595     | -102     | 17910    | 2171    | 2194    | 806      | -102     | -102     | -102     | -102     | -102     | -102    | -102     | -102     | -102     | -102          |
| day 6 after wandering(female)  | 1188    | 8757     | 1361     | 14689   | 20428    | 813      | 4355     | 2314    | 1224    | 1056     | -67      | -67      | -67      | -67      | -67      | -67     | 403      | -67      | -67      | -67           |
| day 6 after wandering(female)  | 1465    | 7039     | 1029     | 16098   | 16774    | 881      | 3599     | 2902    | 1106    | 1045     | -60      | -60      | -60      | -60      | -60      | -60     | 633      | -60      | -60      | -60           |
| day 7 after wandering(female)  | -227    | 1137     | -227     | 4985    | 4835     | -227     | 4974     | 3380    | 3244    | -227     | -227     | -227     | -227     | -227     | -227     | -227    | -227     | -227     | -227     | -227          |
| day 7 after wandering(female)  | -84     | 989      | -84      | 6279    | 3427     | -84      | 3650     | 2608    | 2669    | -84      | -84      | -84      | -84      | -84      | -84      | -84     | -84      | -84      | -84      | -84           |
| day 8 after wandering(female)  | 794     | -97      | -97      | 7455    | 6634     | -97      | 3373     | 3340    | 2170    | 1063     | -97      | 1396     | -97      | -97      | -97      | -97     | -97      | -97      | -97      | 553           |
| day 8 after wandering(female)  | 833     | -90      | -90      | 9270    | 6041     | -90      | 4188     | 3160    | 2709    | 1384     | -90      | 1349     | -90      | -90      | -90      | -90     | -90      | -90      | -90      | 712           |
| day 9 after wandering(female)  | 1575    | -141     | 2369     | 11038   | 6627     | -141     | 10022    | 5393    | 4145    | 1458     | 861      | 4175     | -141     | -141     | -141     | -141    | -141     | -141     | -141     | -141          |
| day 9 after wandering(female)  | 1064    | -96      | 2876     | 10913   | 4983     | -96      | 10281    | 3848    | 4329    | 1211     | 822      | 4919     | -96      | -96      | -96      | -96     | -96      | -96      | -96      | -96           |
| day 10 after wandering(female) | 1591    | -87      | 3613     | 10311   | 3609     | 1789     | 7173     | 3409    | 3255    | 938      | 1099     | 629      | -87      | -87      | 617      | 636     | -87      | -87      | -87      | 1218          |
| day 10 after wandering(female) | 643     | -100     | 3892     | 8906    | 3154     | 1342     | 7704     | 3148    | 3426    | 2318     | 1414     | 736      | -100     | -100     | 632      | 913     | -100     | -100     | -100     | 1673          |
| adult(female)                  | 6981    | -88      | 6052     | 20246   | 9544     | 3108     | 6766     | 6485    | 1939    | 2433     | 4774     | -88      | 1929     | -88      | 1260     | 1037    | -88      | -88      | -88      | -88           |
| adult(female)                  | 4135    | -155     | 5677     | 17146   | 9283     | 2241     | 7873     | 7897    | 2256    | 2547     | 4591     | -155     | 1556     | -155     | 1006     | 982     | -155     | -155     | -155     | -155          |
