# Supplementary material for: Genome-Wide Identification and Immune Response Analysis of Serine Protease Inhibitor Genes in the Silkworm, Bombyx mori
Source: PubMed Central journal article supplement (PMC3278429; doi:10.1371/journal.pone.0031168), 2012-02-13
Supplement: pone.0031168.s008.pdf [file pone.0031168.s008.pdf]

**Supporting Information Table 4**

Ratios and annotations of microorganism induced SPI genes

| Microorganism      | BmSPI80 | BmSPI11 | BmSPI6  | BmSPI24 | BmSPI28 | BmSPI17 | BmSPI16/18/22 | BmSPI37 | BmSPI46 | BmSPI48 | BmSPI39 | BmSPI45 | BmSPI47 | BmSPI49 | BmSPI55 | BmSPI70 | BmSPI62 |
|--------------------|---------|---------|---------|---------|---------|---------|---------------|---------|---------|---------|---------|---------|---------|---------|---------|---------|---------|
| E.coli3h           | 1.5957  | 1.22885 | 0.741   | 0.0843  | -       | 0.2996  | 1.3312        | 0.6747  | 0.6007  | 0.5312  | 0.61115 | 0.47955 | -       | 0.58885 | 1.7743  | 1.1608  | 1.0423  |
| E.coli6h           | 1.2139  | 1.01215 | 0.9769  | 0.788   | 2.07225 | 0.8223  | 0.5754        | 1.0365  | 1.1358  | 0.89375 | 1.10165 | 0.8062  | -       | 0.8511  | 1.231   | 0.9534  | -       |
| E.coli12h          | 0.8296  | 1.3425  | 0.7373  | 0.792   | -       | 0.7918  | 1.0798        | 0.82335 | 0.84355 | 0.7228  | 1.0531  | 1.19375 | -       | 0.7683  | 0.9236  | 0.9723  | -       |
| E.coli24h          | 1.0928  | 2.6122  | 2.22585 | 1.7589  | 4.70535 | 1.48255 | 1.1646        | 3.80725 | 2.5068  | 1.8943  | 2.03015 | 2.98865 | 3.7196  | 1.55675 | 0.4378  | 0.5762  | 0.5781  |
| B.bombysepticus3h  | 1.4816  | 2.07915 | 1.24175 | 0.08985 | -       | 0.2487  | 1.00195       | 0.7973  | 0.22395 | 0.6543  | 0.3566  | 0.4254  | -       | 0.76525 | 1.655   | 1.2921  | -       |
| B.bombysepticus6h  | 0.8757  | 1.25435 | 0.91295 | 0.66275 | 1.47415 | 0.32995 | 0.94985       | 1.0846  | 0.6916  | 0.472   | 0.7186  | 0.85295 | -       | 0.4989  | 1.1852  | 0.8929  | 0.9671  |
| B.bombysepticus12h | 0.8958  | 1.11155 | 0.7001  | 0.32335 | 0.47005 | 0.2859  | 0.8946        | 0.78215 | 0.4914  | 0.62445 | 0.5184  | 0.61605 | -       | 0.68455 | 1.2883  | 1.1423  | -       |
| B.bombysepticus24h | 2.5562  | 1.21205 | 0.66095 | 0.8171  | 0.73375 | 0.4831  | 0.671         | 2.15985 | 2.1383  | 1.01385 | 0.55215 | 0.87245 | -       | 0.8937  | 0.47365 | 0.4073  | 0.2865  |
| B.bassiana6h       | 0.7977  | 0.6378  | 0.3864  | 1.17395 | 1.05155 | 0.35835 | 0.80915       | 1.06705 | 1.0567  | 0.84525 | 1.1341  | 0.7107  | -       | 0.89605 | 1.12915 | 1.0487  | 1.2124  |
| B.bassiana12h      | 0.9827  | 1.11595 | 1.15515 | 1.489   | 1.52455 | 1.77335 | 0.80695       | 0.86405 | 0.9032  | 1.102   | 1.6744  | 0.9684  | -       | 1.0815  | 0.96305 | 1.1426  | 1.3252  |
| B.bassiana24h      | 2.5650  | 2.00885 | 0.68345 | 0.9273  | 0.63715 | 1.0023  | 0.3318        | 1.8088  | 1.4523  | 0.7255  | 0.76515 | 1.1203  | -       | 0.61545 | 0.56625 | 0.3601  | 0.3254  |
| B.bassiana48h      | 3.0628  | 1.50745 | 0.8897  | 0.50215 | 0.31995 | 1.23255 | 0.84385       | 0.5988  | 1.1691  | 2.1426  | 0.6107  | 1.3004  | 0.2917  | -       | 0.8563  | 1.0119  | 0.6788  |
| BmNPV3h            | 1.1222  | 1.3276  | 0.9718  | 0.13545 | -       | 0.15905 | 0.94445       | 0.75945 | 0.31865 | 0.51005 | 0.40175 | 0.52485 | -       | 0.54575 | 1.55555 | 0.9592  | -       |
| BmNPV6h            | 0.4417  | 0.9952  | 2.633   | 0.1956  | -       | 0.0924  | 1.2311        | 0.42685 | 0.37935 | 0.89835 | 0.5692  | 0.47115 | -       | 1.11725 | 2.74895 | 2.6761  | 1.8664  |
| BmNPV12h           | 0.8637  | 0.95535 | 0.51125 | 0.48665 | 0.8276  | 0.4863  | 1.09265       | 0.88955 | 0.57725 | 0.5057  | 0.6989  | 0.55765 | -       | 0.4849  | 1.27705 | 1.1011  | -       |
| BmNPV24h           | 1.4067  | 0.9118  | 0.28675 | 0.68125 | 0.8624  | 0.7517  | 0.8804        | 1.4916  | 0.85235 | 0.5578  | 0.898   | 0.9069  | -       | 0.54535 | 0.69115 | 0.8662  | 0.7264  |
