# Supplementary material for: Genome-Wide Identification and Immune Response Analysis of Serine Protease Inhibitor Genes in the Silkworm, Bombyx mori
Source: PubMed Central journal article supplement (PMC3278429; doi:10.1371/journal.pone.0031168), 2012-02-13
Supplement: pone.0031168.s009.pdf [file pone.0031168.s009.pdf]

**Supporting Information Table 5**

Primer sequences, sizes of PCR production and melting temperature for semi-quantitative RT-PCR

| Gene    | (5'-3') | Primer                     | Size(bp) | Melting temperature(°C) |
|---------|---------|----------------------------|----------|-------------------------|
| BmSPI16 | Forward | GGCGTCAACCAGATTGCCT        | 876      | 56                      |
|         | Reverse | TCAGTGCGTGATAAGGCCAACG     |          |                         |
| BmSPI17 | Forward | CGGCGAAGGTGAAGTATACTCG     | 451      | 56                      |
|         | Reverse | CATCGACAACACTACGCCTATTATGG |          |                         |
| BmSPI18 | Forward | AACGTTAACCAGGCCGTC         | 876      | 56                      |
|         | Reverse | TCAGTTTGTAATAAGGCCAATG     |          |                         |
| BmSPI22 | Forward | TACGTCAACCAGGCCGTC         | 876      | 56                      |
|         | Reverse | TCAGGTCGTAATAATGCCAATG     |          |                         |
| BmSPI36 | Forward | GAGCTTGTTTCGAGAAATCGT      | 180      | 56                      |
|         | Reverse | AACATTCGGCAACGGGCA         |          |                         |
| BmSPI37 | Forward | AGCTGGTTCGAAAACCCGT        | 209      | 56                      |
|         | Reverse | TCACTTGAAATAGCCACCG        |          |                         |
| BmSPI38 | Forward | ATCGTGTTCCCTGATTGTCG       | 207      | 56                      |
|         | Reverse | CAATCAGAAATGGGCACAC        |          |                         |
| BmSPI45 | Forward | GCTATAATCGCTCAGTGCC        | 387      | 56                      |
|         | Reverse | CTTCATTCGGTCTGGTGC         |          |                         |
| BmSPI47 | Forward | CGCTGTTGTTGGATGTGG         | 539      | 56                      |
|         | Reverse | GTGGGCACTGGTTTGGTT         |          |                         |
| BmSPI49 | Forward | CGTCAACATCATCGTCCTC        | 573      | 56                      |
|         | Reverse | GTGCCATTGTCAGCCCTA         |          |                         |
