# Supplementary material for: Genome-Wide Identification and Immune Response Analysis of Serine Protease Inhibitor Genes in the Silkworm, Bombyx mori
Source: PubMed Central journal article supplement (PMC3278429; doi:10.1371/journal.pone.0031168), 2012-02-13
Supplement: pone.0031168.s010.pdf [file pone.0031168.s010.pdf]

### Supporting Information Table 6

Primer sequences and sizes of PCR production for qRT-PCR

| Gene    | (5'-3') | Primer                     | Size(bp) |
|---------|---------|----------------------------|----------|
| BmSPI6  | Forward | GGTACTTCGTCCATTTCTTC       | 148      |
|         | Reverse | GGTTTAGTTCGCTTAGGATTGT     |          |
| BmSPI11 | Forward | TGTCTTGATACACGAGCACTG      | 103      |
|         | Reverse | CTGGCGATACCATCACATTG       |          |
| BmSPI37 | Forward | ACGGCTTTCATCGCAACCT        | 83       |
|         | Reverse | GAACATTCAGCAACAGGCAC       |          |
| BmSPI39 | Forward | GACTGTAACAACACTGATTCCGACTT | 178      |
|         | Reverse | CGGCAATTTTCATACTATAACCC    |          |
| BmSPI46 | Forward | TAGATGAACGCACGATAAGG       | 229      |
|         | Reverse | GACGGAGCACAAAGCACTAA       |          |
| BmSPI48 | Forward | TTGTCGGTTCGAGAAGTGTTTC     | 156      |
|         | Reverse | AGAGGTCAGCGTCACAATCAC      |          |
